# Supplementary material
Source: PubMed Central journal article supplement (PMC3293520)
Supplement: supp_M111.286724_jbc.M111.286724-1.pdf [file supp_M111.286724_jbc.M111.286724-1.pdf]

**Fig.S1 Expression levels of LRP6 in  $LRP6^{+/-}$  mice and wildtype littermates (WT).** Relative LRP6 mRNA expression level by qRT-PCR in the brown adipose tissue and liver of  $LRP6^{+/-}$  and wild-type (WT) mice (n = 8, mean  $\pm$ SEM, **\*\*P < 0.001**) (A). LRP6 protein levels in the liver and brown adipose tissues of the  $LRP6^{+/-}$  and WT mice (n = 8, data are mean $\pm$ SEM by densitometry, **p < 0.01**) (B).

**Fig.2 Skeletal muscle insulin signaling in  $LRP6^{+/-}$  mice and wildtype littermates (WT).**

**Fig.S3 Growth curve and body fat mass of  $LRP6^{+/-}$  mice on chow diet.** Growth curve of 8 week old male  $LRP6^{+/-}$  (filled circles) and WT mice (unfilled circles) on a chow diet. Mice were weighed once every 2 weeks at the same daytime for 16 weeks (data are mean $\pm$ SEM, **\*P < 0.05**) (A). Comparison of percentage total body fat in  $LRP6^{+/-}$  and WT mice on chow diet by Dual Energy X-ray Absorptiometry (DEXA) scanning (n = 12 mice per group, differences were not statistically significant)

**Fig.S4 Serum adipokines in  $LRP6^{+/-}$  mice and wildtype littermates (WT).** Serum adiponectin levels were only modestly higher in  $LRP6^{+/-}$  compared to WT mice (A). Serum leptin levels were not significantly different between  $LRP6^{+/-}$  and WT mice on high fat diet (B) (mean $\pm$ SEM, **P > 0.5**).

**Fig. S5 UCP1 mRNA(A) and protein levels (B) of the white (abdominal) adipose tissue in  $LRP6^{+/-}$  compared to WT mice(\*P < 0.001).**

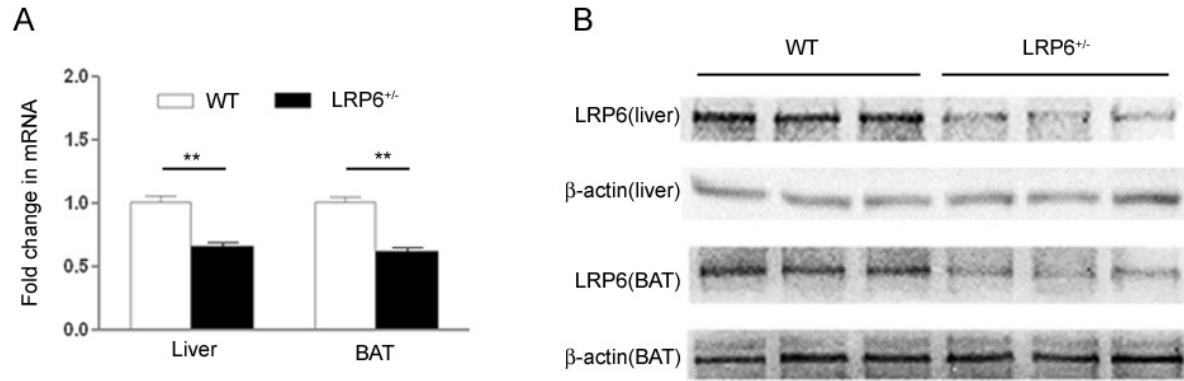

**Fig.S1** Expression levels of LRP6 in *LRP6*<sup>-/-</sup> mice and wildtype littermates (WT).

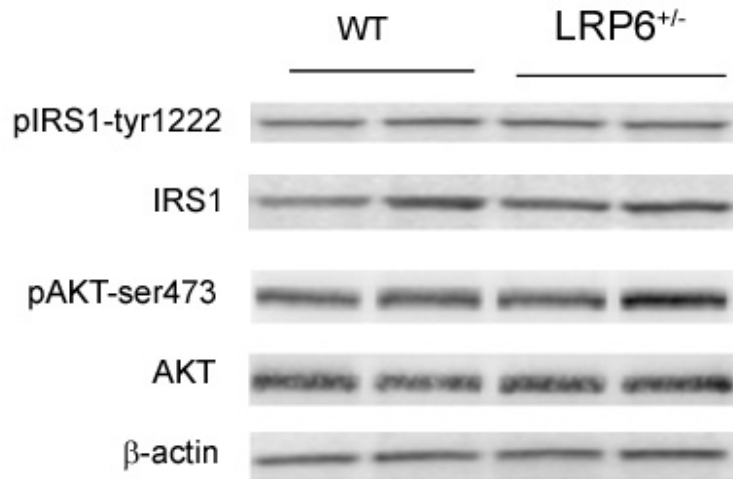

**Fig.2** Skeletal muscle insulin signaling in *LRP6*<sup>+/-</sup> mice and wildtype littermates (WT).

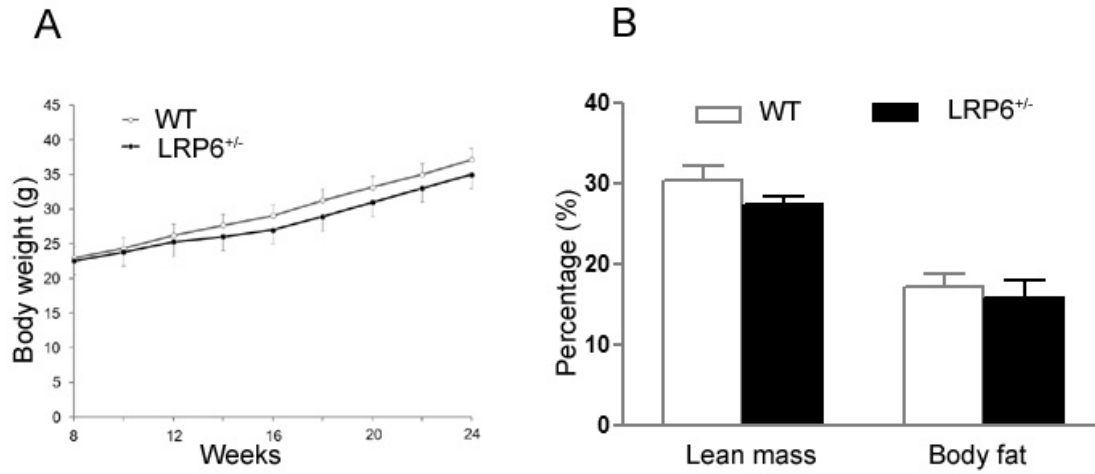

Fig.S3 Growth curve and body fat mass of *LRP6*<sup>+/-</sup> mice on chow diet.

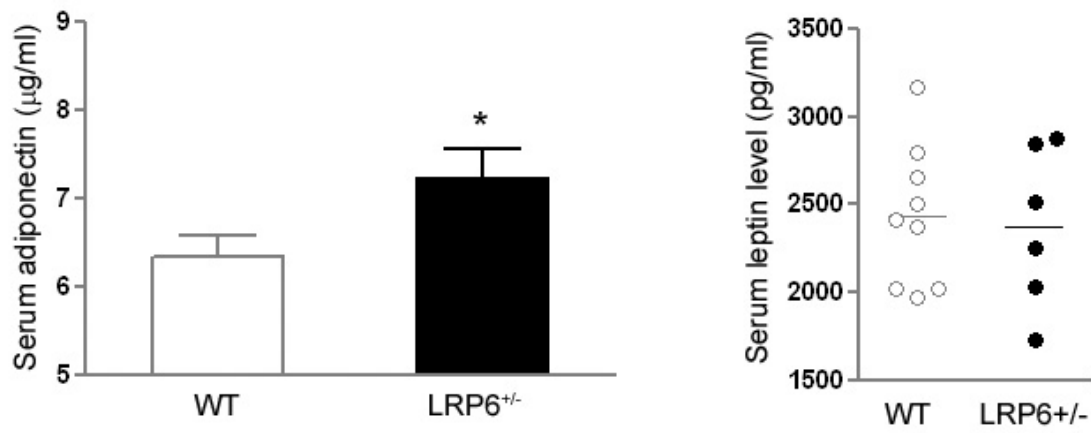

Fig.S4 Serum adipokines in *LRP6*<sup>+/-</sup> mice and wildtype littermates (WT).

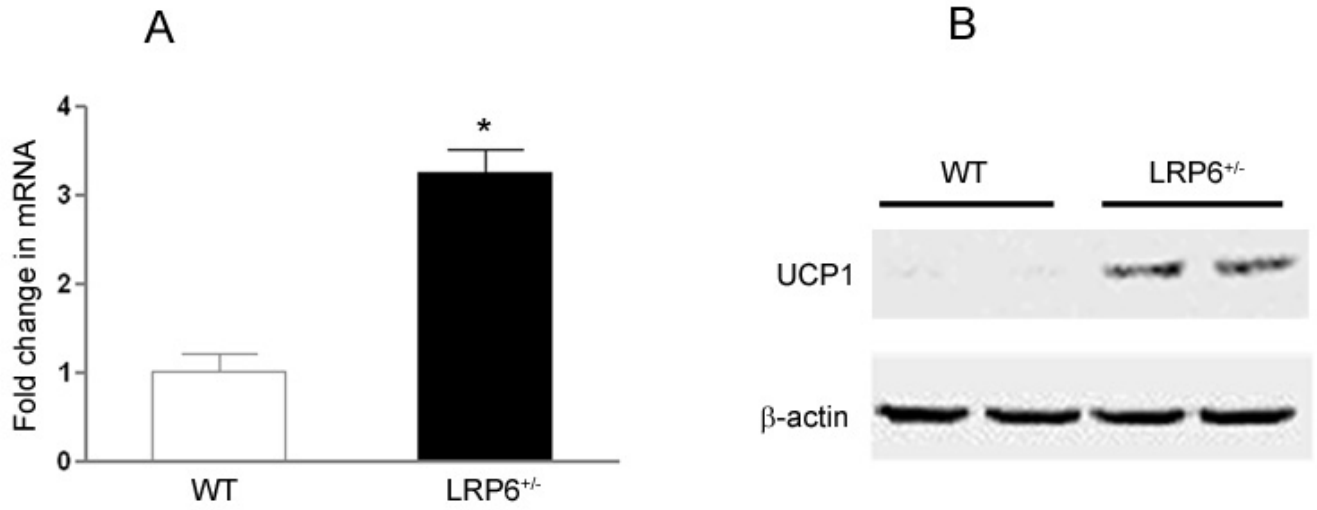

**Fig. S5 UCP1 mRNA(A) and protein levels (B) of the white (abdominal) adipose tissue in *LRP6*<sup>+/-</sup> compared to WT mice(\**P* < 0.001).**

| Chow Diet      |            |             |            |             |
|----------------|------------|-------------|------------|-------------|
| <b>N=8</b>     | <b>LDL</b> | <b>CHOL</b> | <b>HDL</b> | <b>TG</b>   |
| <b>WT</b>      | 5.23±0.77  | 81.95±8.66  | 42.63±5.29 | 54.88±10.99 |
| <b>LRP6+/-</b> | 5.67±0.47  | 78.34±13.20 | 36.32±5.69 | 63.4±16.86  |
| <b>p</b>       | 0.21       | 0.57        | 0.10       | 0.43        |

| HFD            |            |              |             |             |
|----------------|------------|--------------|-------------|-------------|
| <b>N=8</b>     | <b>LDL</b> | <b>CHOL</b>  | <b>HDL</b>  | <b>TG</b>   |
| <b>WT</b>      | 5.94±0.92  | 110.05±12.49 | 49.44±6.62  | 62.97±11.38 |
| <b>LRP6+/-</b> | 5.36±0.87  | 103.73±17.84 | 47.30±10.26 | 62.1±15.31  |
| <b>p</b>       | 0.27       | 0.47         | 0.66        | 0.91        |

Table S1- Lipid profiles of LRP6 +/- mice on chow diet (top) and high fat diet (HFD, bottom) Compared to wildtype littermates

Table S2-Relative mRNA expression of genes differentially regulated in LRP6<sup>+/-</sup> mice vs. wildtype littermates from Affymetrix GeneChip microarray analysis of the liver tissue

| Genes      | p value | Fold change |
|------------|---------|-------------|
| Lrtm1      | 0.01    | 3.9         |
| Socs2      | 0.01    | 3.7         |
| Onecut1    | 0.01    | 3.5         |
| Prlr       | 0.05    | 2.5         |
| Moxd1      | 0.02    | 2.4         |
| Cyp7a1     | 0.00    | 2.2         |
| Rgs1       | 0.02    | 2.2         |
| Gm13487    | 0.02    | 2.2         |
| St6galnac3 | 0.02    | 2.1         |
| Idi1       | 0.05    | 2.1         |
| Agxt2l1    | 0.04    | 2.1         |
| Igk-V1     | 0.01    | 2.1         |
| Gm10767    | 0.03    | 2.0         |
| Gas5       | 0.03    | 2.0         |
| Lepr       | 0.04    | 1.9         |
| Rnu3a      | 0.04    | 1.9         |
| Sqle       | 0.02    | 1.9         |
| Zfp292     | 0.00    | 1.9         |
| Cib3       | 0.02    | 1.9         |
| Olf810     | 0.02    | -1.9        |
| Adam11     | 0.05    | -2.0        |
| Fam131c    | 0.02    | -2.2        |
| Hyi        | 0.00    | -2.2        |
| Prg4       | 0.02    | -2.3        |
| Saa3       | 0.00    | -4.6        |
| Bcl6       | 0.03    | -4.8        |
| Orm2       | 0.01    | -4.9        |
| Saa2       | 0.00    | -8.9        |
